# Supplementary material
Source: PubMed Central journal article supplement (PMC7984931)
Supplement: NIHMS1678579-supplement-1.pdf [file NIHMS1678579-supplement-1.pdf]

# Table S1

| Enhancer (rel. to TSS) | Forward primer seq (5' - 3') | Reverse primer seq (5' - 3') | Primer (genomic) co-ordinates | Amplicon size (kb) |
|------------------------|------------------------------|------------------------------|-------------------------------|--------------------|
| -180kb                 | ACTCCAGGACCCTGTTTGTG         | GCAAACAGCATCACAGAGGA         | chr15:36,867,314 - 36,868,655 | 2,341              |
| -97kb                  | AGGTCAGCCTCAGCACTGTT         | AGAAGCTGCCAGGTGACTGT         | chr15:37,064,191 - 37,066,506 | 2,316              |
| -40kb                  | CCGCTCACTTCTGTGGTACA         | AGCCAGTGCTGGGCTAGATA         | chr15:37,121,875 - 37,122,942 | 1,068              |
| -34kb                  | CAGAAACAGTCCCTCGCTTC         | AGCAACAACACTGTGTGCAAGG       | chr15:37,127,220 - 37,129,961 | 2,742              |
| -23kb                  | AAAAGGCGTTTCCTCTGGAT         | TCCTTCTACCACGTGGGTTC         | chr15:37,139,015 - 37,140,627 | 1,613              |
| Prox. Prom.            | GGAGAAGGGCCTTACCTGAG         | TCGTA CT CGGCCTCAAATC        | chr15:37,162,686 - 37,163,910 | 1,225              |

# Table S2

| sgRNA sequences | Founder line | Deletion co-ordinates (mm9)   | Size of deletion (kb) | Genotyping primers used                              | Amplicon size (genotyping) |
|-----------------|--------------|-------------------------------|-----------------------|------------------------------------------------------|----------------------------|
| sgRNA_01L       | C4379        | chr15:37,126,673 - 37,130,417 | 3,745bp               | F:5'-at t t t c t g t g g g c t t g t c t g t t -3'  | 761bp                      |
| sgRNA_03R       | C4386        | chr15:37,126,674 - 37,130,413 | 3,740bp               | R:5'-g a g g c a g a t c a t a c a c a c c a a a -3' |                            |

# Fig. S1

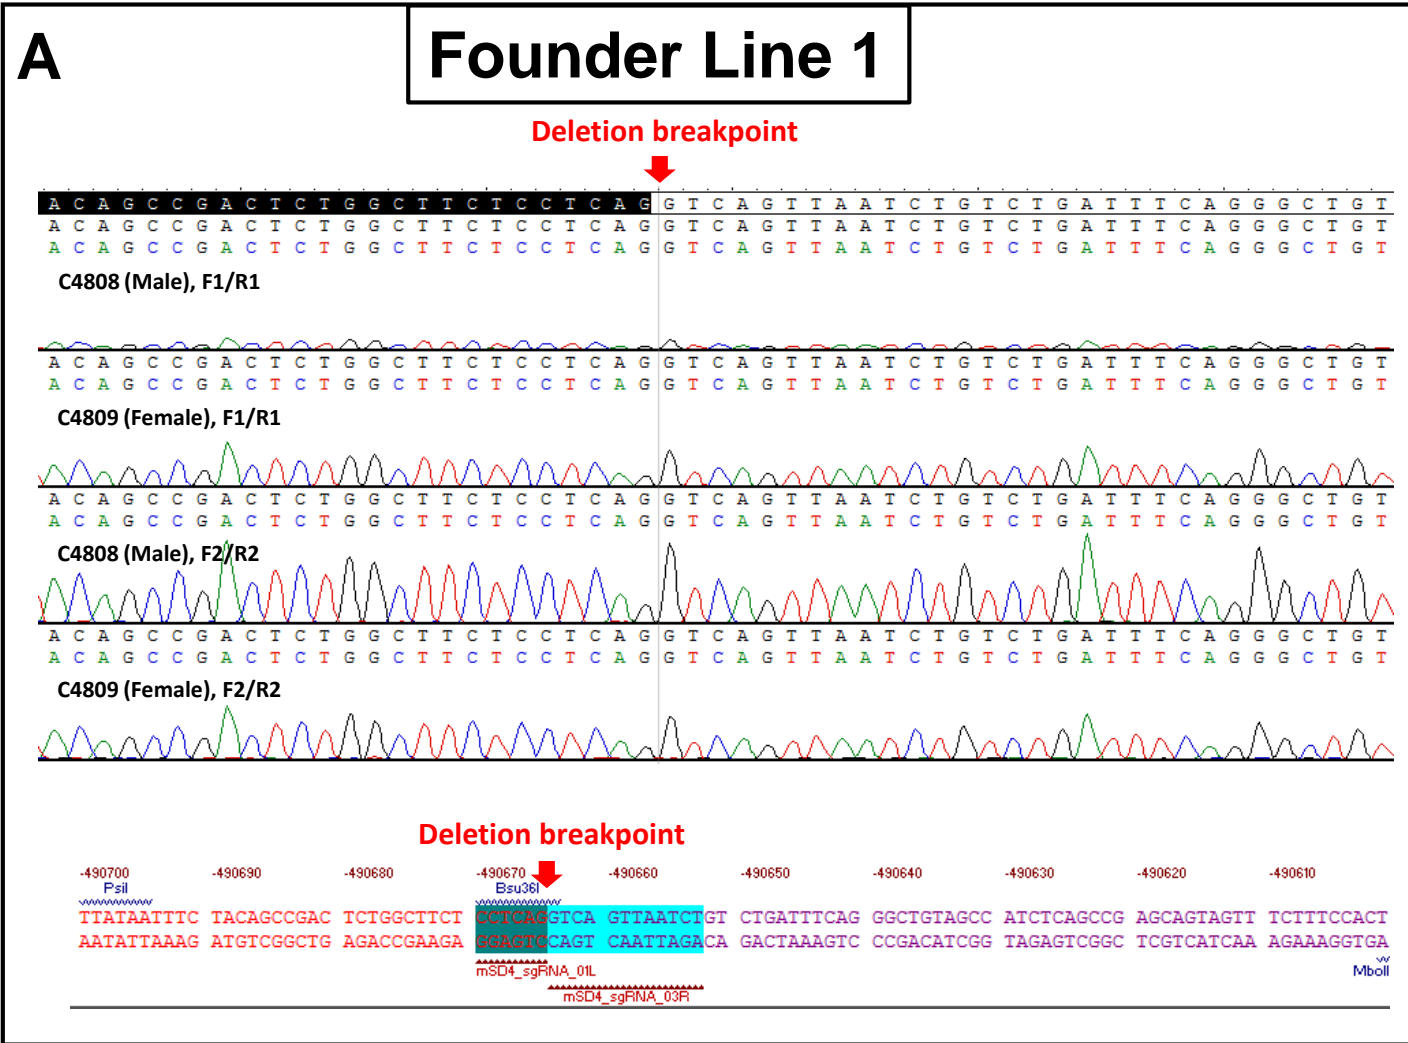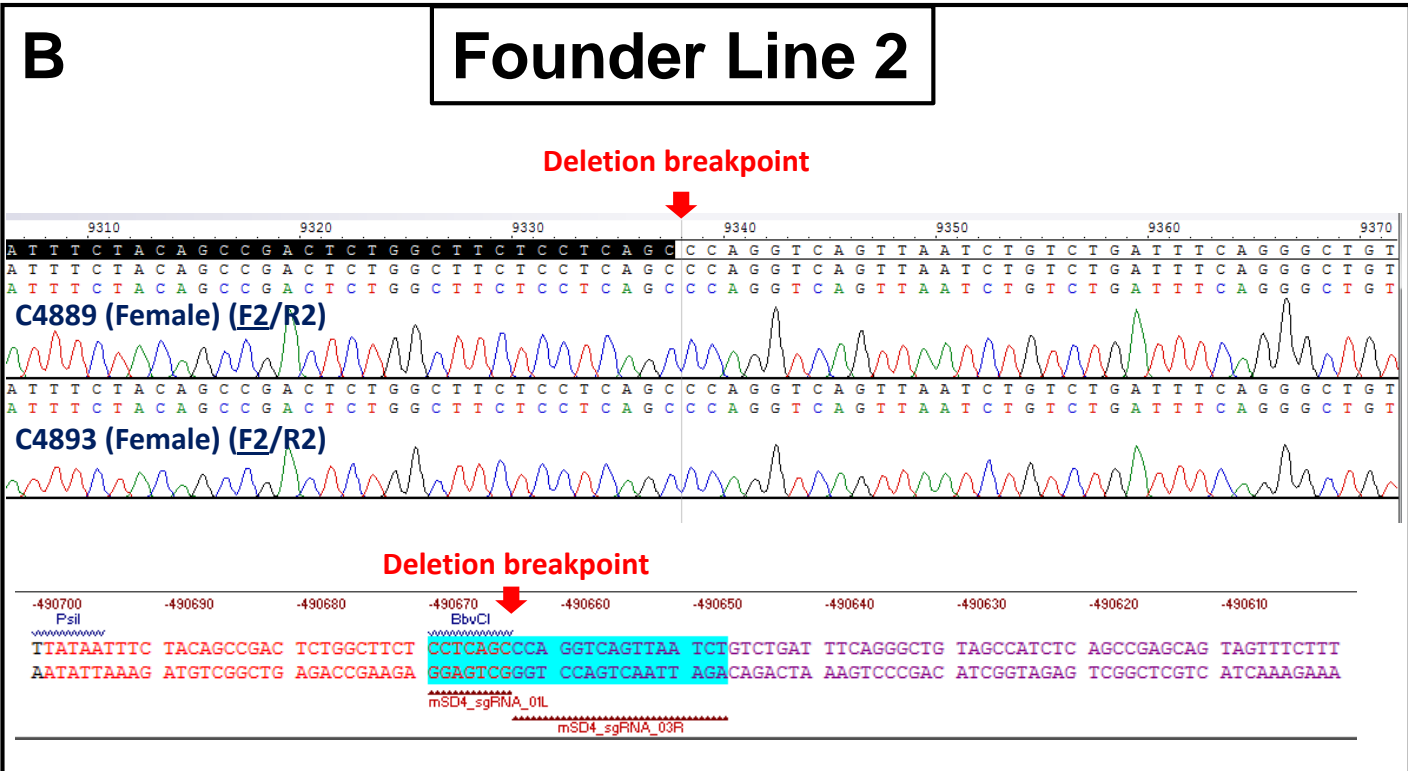

**Fig. S2**

**A**

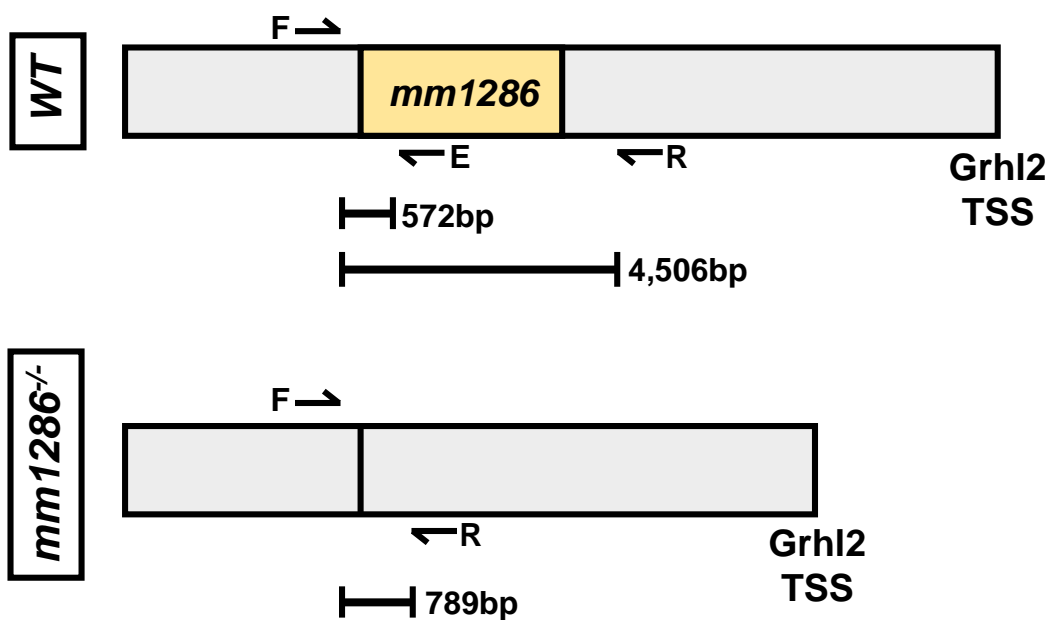

**B**

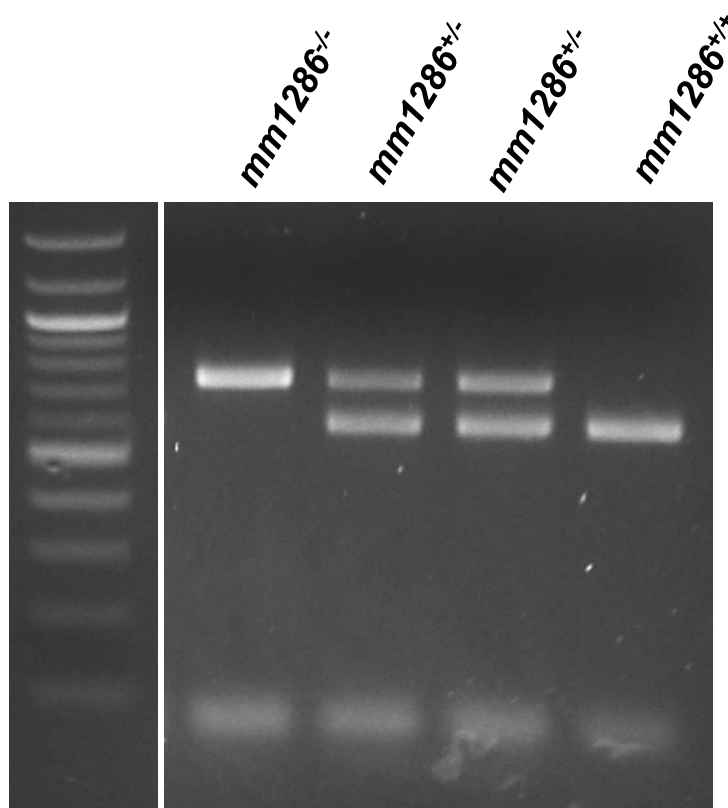

**Fig. S3**

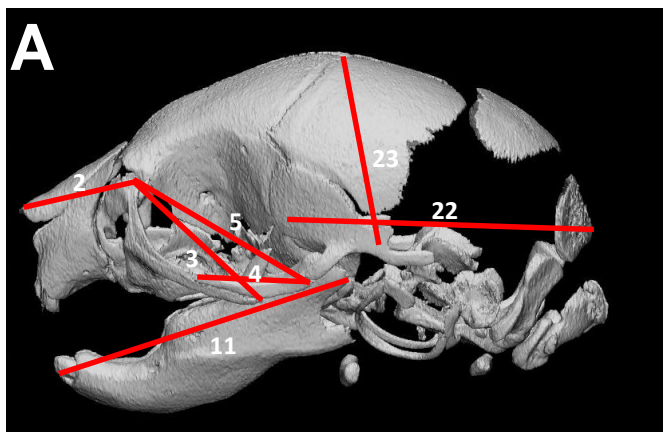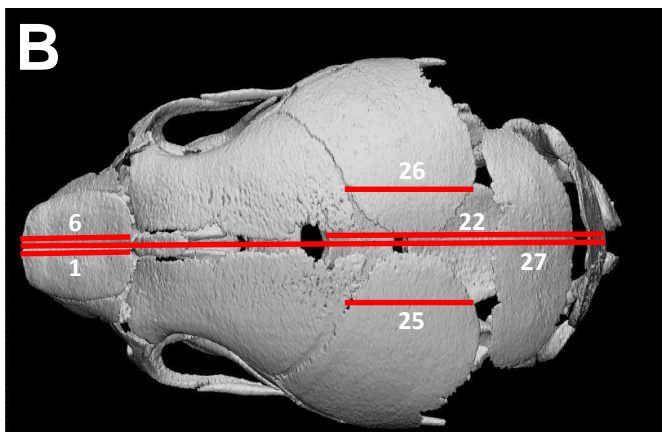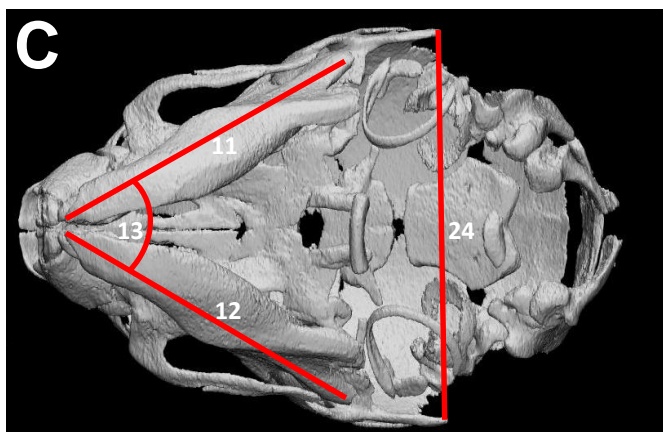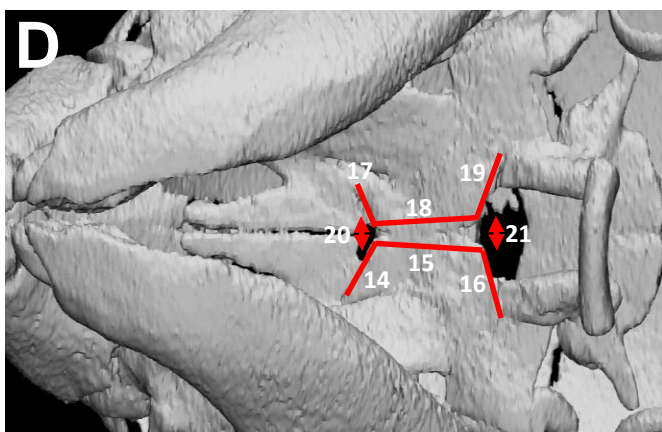

# Table S3

## Skull landmarks for $\mu$ CT analysis

| Mark       | Location                                                                                                 |
|------------|----------------------------------------------------------------------------------------------------------|
| <b>N1</b>  | Most antero-medial point of the nasal bone, left side                                                    |
| <b>N2</b>  | Most postero-medial point of the nasal bone, left side                                                   |
| <b>N3</b>  | Most antero-medial point of the nasal bone, right side                                                   |
| <b>N4</b>  | Most postero-medial point of the nasal bone, right side                                                  |
| <b>M1</b>  | Intersection of frontal process of maxilla with frontal and lacrimal bones, left side                    |
| <b>M2</b>  | Intersection of zygoma with zygomatic process of maxilla, taken on maxilla, left side                    |
| <b>M3</b>  | Intersection of zygoma with zygomatic process of maxilla, taken on zygoma, left side                     |
| <b>M4</b>  | Intersection of zygoma with zygomatic process of temporal, taken on zygoma, left side                    |
| <b>M5</b>  | Intersection of frontal process of maxilla with frontal and lacrimal bones, right side                   |
| <b>M6</b>  | Intersection of zygoma with zygomatic process of maxilla, taken on maxilla, right side                   |
| <b>M7</b>  | Intersection of zygoma with zygomatic process of maxilla, taken on zygoma, right side                    |
| <b>M8</b>  | Intersection of zygoma with zygomatic process of temporal, taken on zygoma, right side                   |
| <b>J1</b>  | Inferior-most point on incisor alveolar rim at midline of the incisor at bone-tooth junction, left side  |
| <b>J2</b>  | Most caudal point on the ventral angle of the condyloid process, left side                               |
| <b>J3</b>  | Inferior-most point on incisor alveolar rim at midline of the incisor at bone-tooth junction, right side |
| <b>J4</b>  | Most caudal point on the ventral angle of the condyloid process, right side                              |
| <b>Ja</b>  | Angle between J1-J2 and J3-J4 at the anterior point of the mandible                                      |
| <b>P1</b>  | Most anterolateral point on the posterior palatine plate, left side                                      |
| <b>P2</b>  | Most anteromedial point on the posterior palatine plate, left side                                       |
| <b>P3</b>  | Most posteromedial point on the posterior palatine plate, left side                                      |
| <b>P4</b>  | Most posterolateral point on the posterior palatine plate, left side                                     |
| <b>P5</b>  | Most anterolateral point on the posterior palatine plate, right side                                     |
| <b>P6</b>  | Most anteromedial point on the posterior palatine plate, right side                                      |
| <b>P7</b>  | Most posteromedial point on the posterior palatine plate, right side                                     |
| <b>P8</b>  | Most posterolateral point on the posterior palatine plate, right side                                    |
| <b>S1</b>  | Most antero-medial point on the body of the sphenoid                                                     |
| <b>S2</b>  | Mid-point on the posterior margin of the foramen magnum, taken on squamous occipital                     |
| <b>S3</b>  | Most medial intersection of the frontal and parietal bones, taken on the frontal, left side              |
| <b>S4</b>  | Most medial intersection of the frontal and parietal bones, taken on the frontal, right side             |
| <b>S5</b>  | Most postero-medial point on the parietal, left side                                                     |
| <b>S6</b>  | Most postero-medial point on the parietal, right side                                                    |
| <b>S7</b>  | Most antero-lateral point on corner of the basioccipital, left side                                      |
| <b>S8</b>  | Most antero-lateral point on corner of the basioccipital, right side                                     |
| <b>S9</b>  | Most posterior point on the posterior extension of the forming squamosal, left side                      |
| <b>S10</b> | Most posterior point on the posterior extension of the forming squamosal, right side                     |

**Fig. S4**

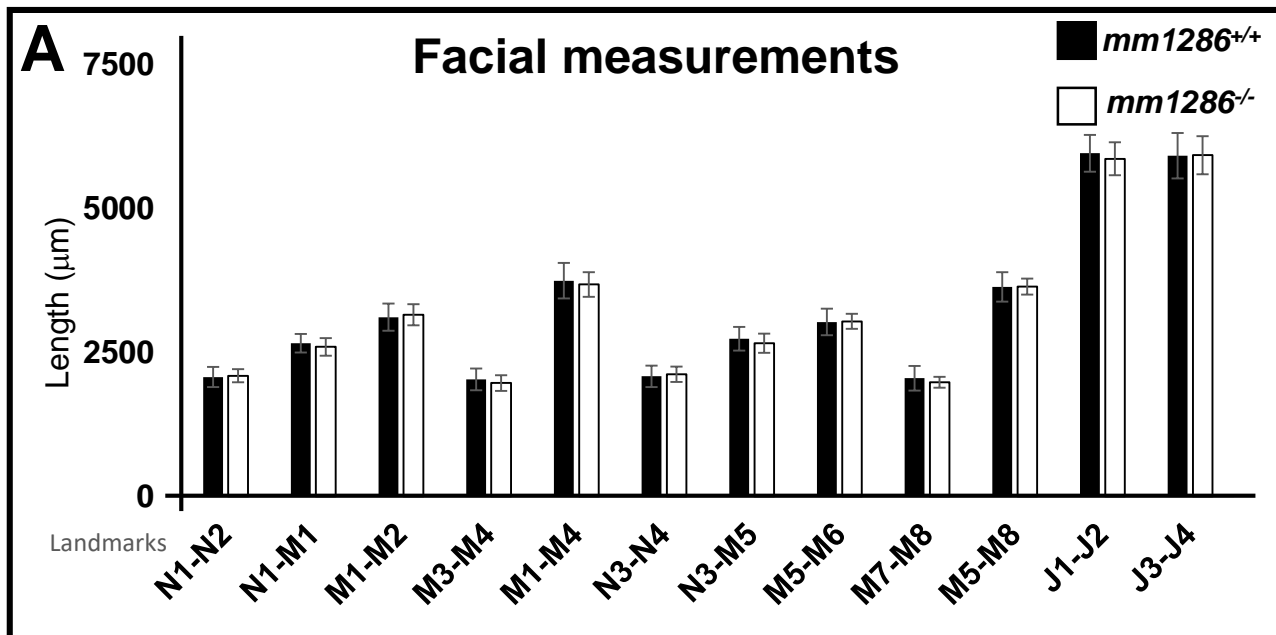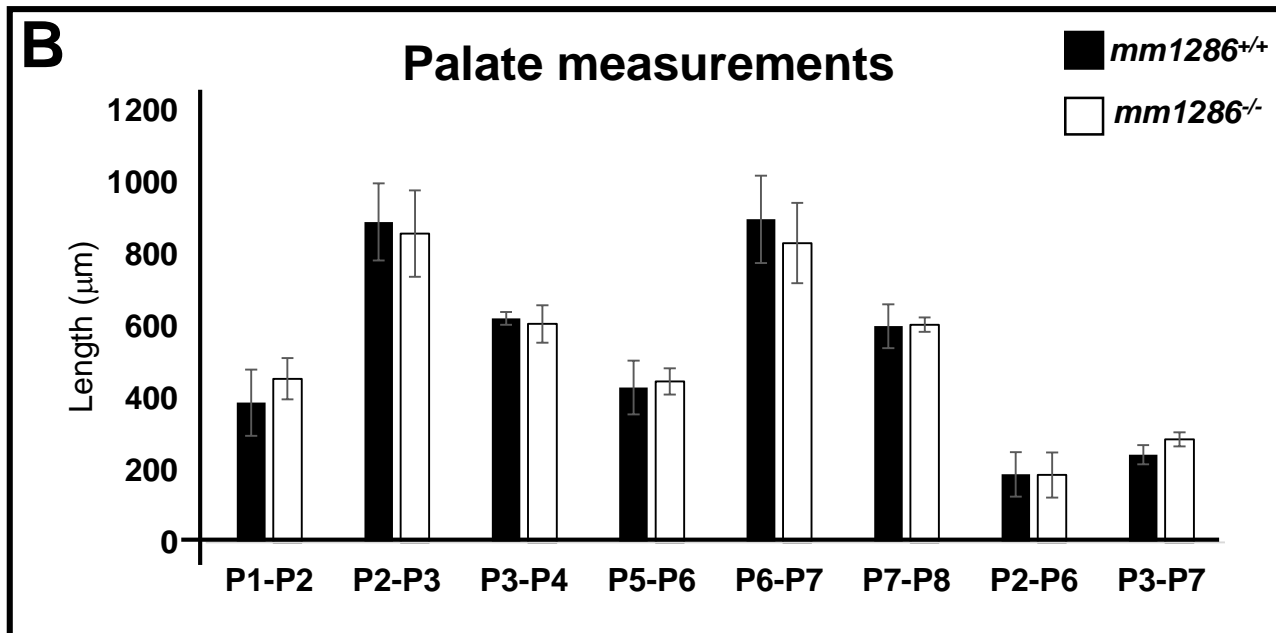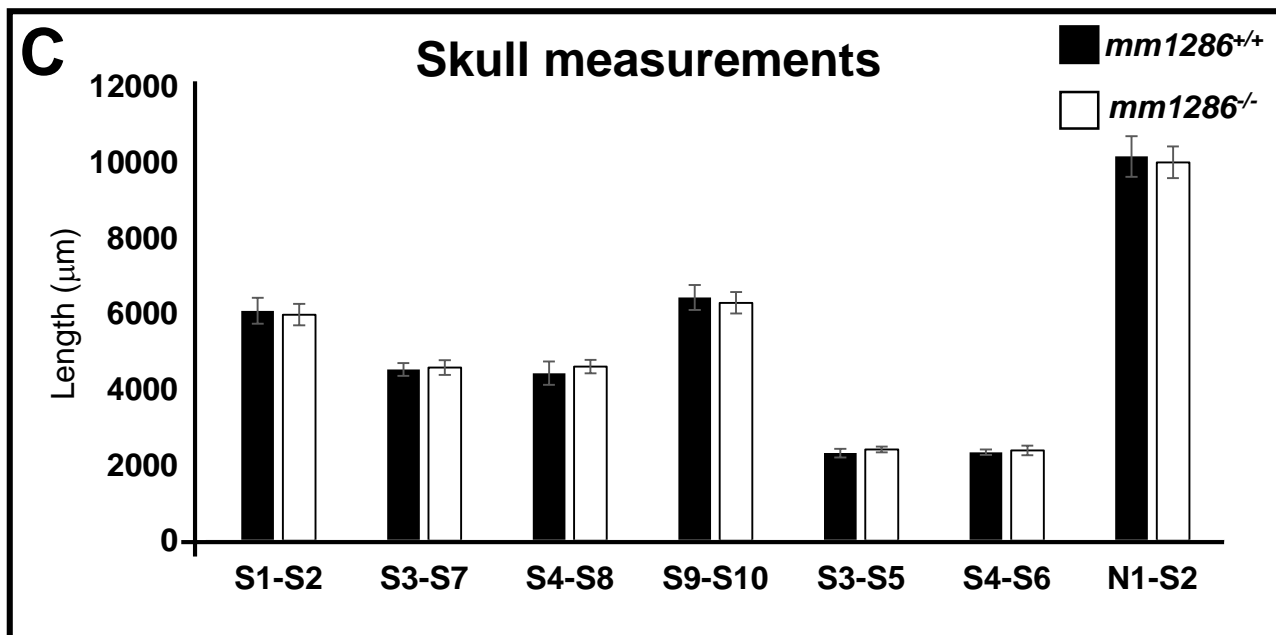

**Table S4**

|              | <b>μCT Measurements</b> |       |                                        |                   |
|--------------|-------------------------|-------|----------------------------------------|-------------------|
| <b>Point</b> | <b>Marks</b>            |       | <b>Description</b>                     | <b>Annotation</b> |
|              | <b>FACE</b>             |       |                                        |                   |
| <b>1</b>     | N1                      | N2    | Length of left nasal bone              | N1-N2             |
| <b>2</b>     | N1                      | M1    | Approximate premaxillary length, Left  | N1-M1             |
| <b>3</b>     | M1                      | M2    | Maxilla length, Left                   | M1-M2             |
| <b>4</b>     | M3                      | M4    | Zygomatic length, Left                 | M3-M4             |
| <b>5</b>     | M1                      | M4    | Maxilla zygomatic length, Left         | M1-M4             |
| <b>6</b>     | N3                      | N4    | Length of right nasal bone             | N3-N4             |
| <b>7</b>     | N3                      | M5    | Approximate premaxillary length, Right | N3-M5             |
| <b>8</b>     | M5                      | M6    | Maxilla length, Right                  | M5-M6             |
| <b>9</b>     | M7                      | M8    | Zygomatic length, Right                | M7-M8             |
| <b>10</b>    | M5                      | M8    | Maxilla zygomatic length, Right        | M5-M8             |
| <b>11</b>    | J1                      | J2    | Jaw length, Left                       | J1-J2             |
| <b>12</b>    | J3                      | J4    | Jaw length, Right                      | J3-J4             |
| <b>13</b>    | J1-J2                   | J3-J4 | Mandible angle                         | Ja                |
|              | <b>PALATE</b>           |       |                                        |                   |
| <b>14</b>    | P1                      | P2    | Anterior palate shelf width, Left      | P1-P2             |
| <b>15</b>    | P2                      | P3    | Palate shelf length, Left              | P2-P3             |
| <b>16</b>    | P3                      | P4    | Posterior palate shelf width, Left     | P3-P4             |
| <b>17</b>    | P5                      | P6    | Anterior palate shelf width, Right     | P5-P6             |
| <b>18</b>    | P6                      | P7    | Palate shelf length, Right             | P6-P7             |
| <b>19</b>    | P7                      | P8    | Posterior palate shelf width, Right    | P7-P8             |
| <b>20</b>    | P2                      | P6    | Anterior space between shelves         | P2-P6             |
| <b>21</b>    | P3                      | P7    | Posterior space between shelves        | P3-P7             |
|              | <b>SKULL</b>            |       |                                        |                   |
| <b>22</b>    | S1                      | S2    | Length of skull vault                  | S1-S2             |
| <b>23</b>    | S3/S4                   | S7/S8 | Height of skull vault                  | S3-S7/S4-S8       |
| <b>24</b>    | S9                      | S10   | Width of skull vault                   | S9-S10            |
| <b>25</b>    | S3                      | S5/S6 | Distance of parietal sutures           | S3/S4             |
| <b>26</b>    | S4                      | S5/S7 | Distance of parietal sutures           | S4/S6             |
| <b>27</b>    | N1                      | S5/S8 | Length of skull                        | N1-S2             |

# Table S5

**A**

## *mm1286<sup>+/-</sup> x mm1286<sup>+/-</sup>*

| <b>E14.5</b>                | Observed | Expected | Observed % | Expected % | $\chi$ -square |
|-----------------------------|----------|----------|------------|------------|----------------|
| <i>mm1286<sup>+/+</sup></i> | 4        | 5        | 20.0%      | 25%        | <b>0.861</b>   |
| <i>mm1286<sup>+/-</sup></i> | 11       | 10       | 55.0%      | 50%        |                |
| <i>mm1286<sup>-/-</sup></i> | 5        | 5        | 25.0%      | 25%        |                |
| <b>TOTAL</b>                | 20       |          |            |            |                |

| <b>P0</b>                   | Observed | Expected | Observed % | Expected % | $\chi$ -square |
|-----------------------------|----------|----------|------------|------------|----------------|
| <i>mm1286<sup>+/+</sup></i> | 15       | 11       | 34.1%      | 25%        | <b>0.376</b>   |
| <i>mm1286<sup>+/-</sup></i> | 19       | 22       | 43.2%      | 50%        |                |
| <i>mm1286<sup>-/-</sup></i> | 10       | 11       | 22.7%      | 25%        |                |
| <b>TOTAL</b>                | 44       |          |            |            |                |

**B**

## *Grhl2<sup>+/-</sup> x mm1286<sup>+/-</sup>*

| <b>P0</b>                                       | Observed        | Expected | Observed % | Expected % | $\chi$ -square |
|-------------------------------------------------|-----------------|----------|------------|------------|----------------|
| <i>Grhl2<sup>+/+</sup>;mm1286<sup>+/+</sup></i> | 20              | 19.25    | 25.5%      | 25%        | <b>0.986</b>   |
| <i>Grhl2<sup>+/+</sup>;mm1286<sup>+/-</sup></i> | 19              | 19.25    | 23.2%      | 25%        |                |
| <i>Grhl2<sup>+/-</sup>;mm1286<sup>+/+</sup></i> | 20              | 19.25    | 25.5%      | 25%        |                |
| <i>Grhl2<sup>+/-</sup>;mm1286<sup>+/-</sup></i> | 18 <sup>^</sup> | 19.25    | 20.9%      | 25%        |                |
| <b>TOTAL</b>                                    | 77              |          |            |            |                |

**<sup>^</sup>3/18 embryos showed palatal clefting; p=0.011**
